# Supplementary material for: Assessing the Genomic Landscape of Cervical Cancers: Clinical Opportunities and Therapeutic Targets
Source: Oxford University Press journal article supplement (doi:10.1158/1078-0432.ccr-23-1078), 2023-08-29
Supplement: ccr-23-1078_supplementary_figure_s2_suppfs2.pdf [file ccr-23-1078_supplementary_figure_s2_suppfs2.pdf]

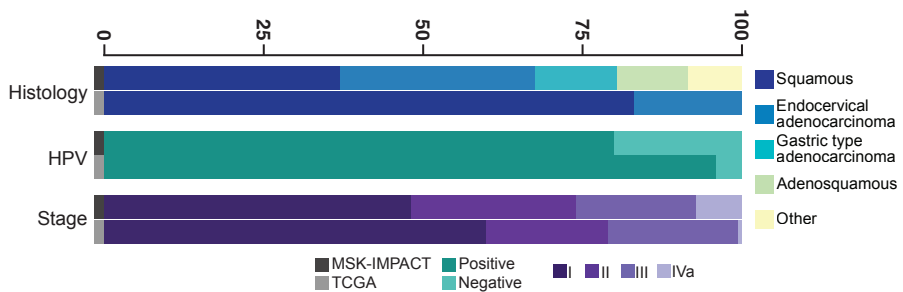

**Supp Figure 2: Comparison of the MSK-IMPACT Cervical Cancer Cohort and the TCGA cohort for patients with Stages I-IVA disease.** HPV, human papillomavirus; IMPACT, Memorial Sloan Kettering Cancer Center – Integrated Mutation Profiling of Actionable Cancer Targets; TCGA, The Cancer Genome Atlas.
